# Supplementary material
Source: HighWire-hosted journal article supplement (https://mentalhealth.bmj.com/highwire/filestream/68435/field_highwire_adjunct_files/0/6372Fig1.pdf)
Supplement: 6372Fig1.pdf [file 6372Fig1.pdf]

## EBMH Notebook: the number needed to treat: problems describing non-significant results

**Figure 1** Relationship between NNT and ARR

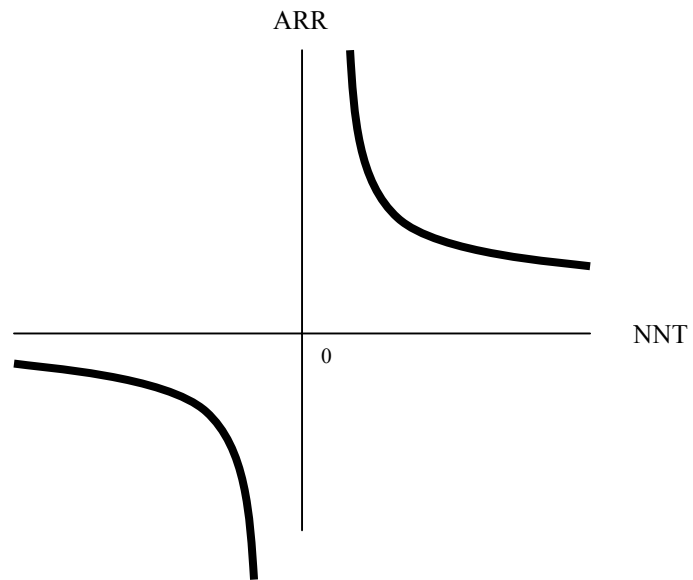

Note that at the 'line of no effect,' the NNT is both plus and minus infinity.
